# Supplementary material
Source: Springer Nature journal article supplement (https://www.springermedizin.de/resource/supplementary/13063_2012_1098_MOESM5_ESM.pdf/9619700)

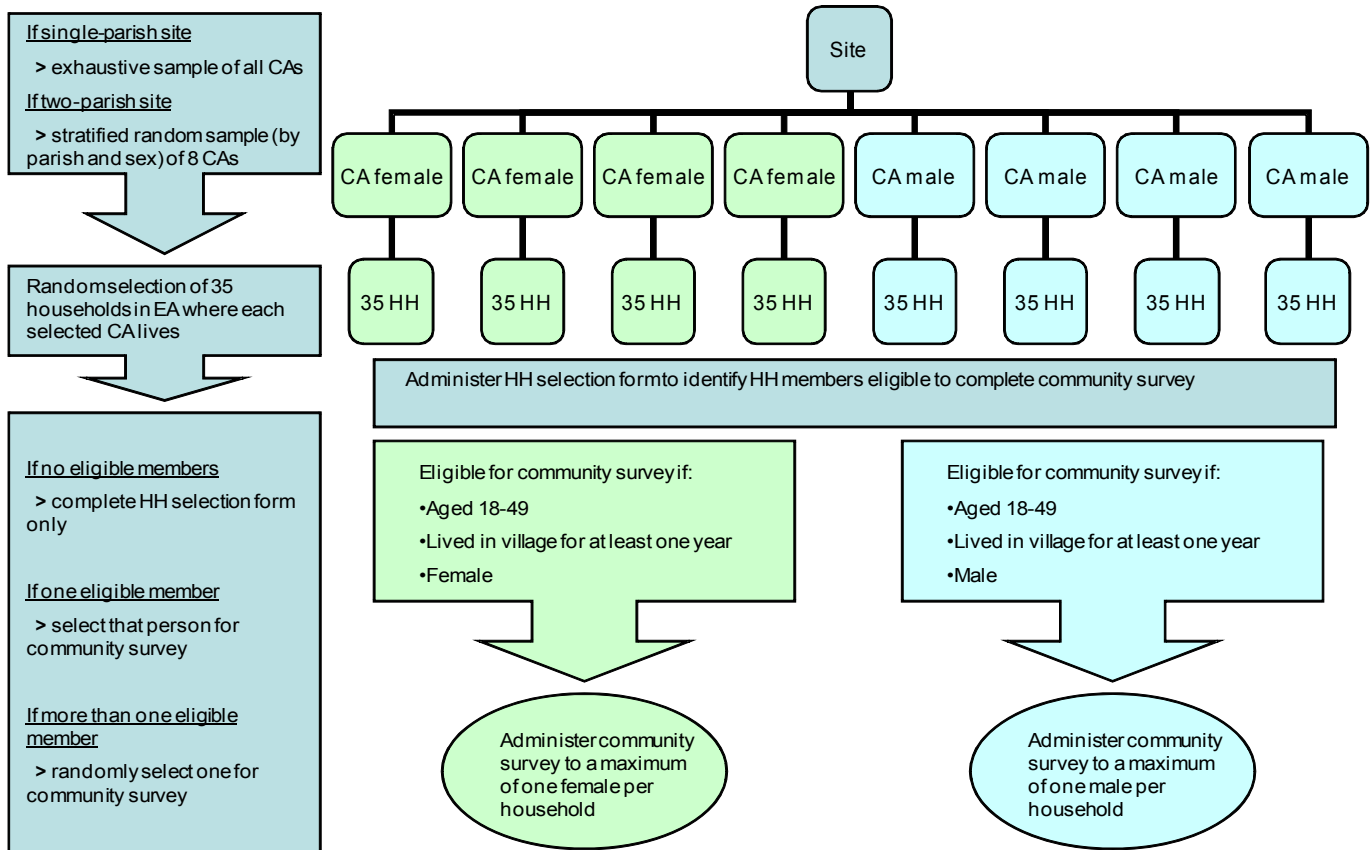

Supplement: MOESM5 [file 9619700]
